# Supplementary material
Source: PubMed Central journal article supplement (PMC4397214)
Supplement: NIHMS645458-supplement-2.pdf [file NIHMS645458-supplement-2.pdf]

**Table S1.** Genetic SNV and CNV events from the Simons Simplex Collection used as input for NETBAG. See attached Excel spreadsheet.

**Table S2.** Implicated ASD network genes and associated prioritization annotations (average  $\log_2$  brain expression and truncating SNV status). See attached Excel spreadsheet.

| <b>Table S3. Gene Ontology (GO) terms associated with the functional clusters</b> |                 |                                                                    |                     |
|-----------------------------------------------------------------------------------|-----------------|--------------------------------------------------------------------|---------------------|
| <b>Postsynaptic density (Fig. 1, cyan)</b>                                        |                 |                                                                    |                     |
| <b>GO ID</b>                                                                      | <b>Ontology</b> | <b>Term</b>                                                        | <b>P-value</b>      |
| GO:0045202                                                                        | CC              | Synapse                                                            | $1 \times 10^{-9}$  |
| GO:0044456                                                                        | CC              | synapse part                                                       | $3 \times 10^{-7}$  |
| GO:0014069                                                                        | CC              | postsynaptic density                                               | $4 \times 10^{-6}$  |
| GO:0045211                                                                        | CC              | postsynaptic membrane                                              | $4 \times 10^{-5}$  |
| GO:0004385                                                                        | MF              | guanylate kinase activity                                          | 0.0009              |
| GO:0019201                                                                        | MF              | nucleotide kinase activity                                         | 0.002               |
| GO:0007268                                                                        | BP              | synaptic transmission                                              | 0.002               |
| GO:0019226                                                                        | BP              | transmission of nerve impulse                                      | 0.003               |
| GO:0016776                                                                        | MF              | phosphotransferase activity, phosphate group as acceptor           | 0.003               |
| GO:0019205                                                                        | MF              | nucleobase, nucleoside, nucleotide kinase activity                 | 0.004               |
| GO:0048489                                                                        | BP              | synaptic vesicle transport                                         | 0.008               |
| GO:0050808                                                                        | BP              | synapse organization                                               | 0.02                |
| GO:0003001                                                                        | BP              | generation of a signal involved in cell-cell signaling             | 0.03                |
| <b>Channel activity (Fig. 1, blue)</b>                                            |                 |                                                                    |                     |
| <b>GO ID</b>                                                                      | <b>Ontology</b> | <b>Term</b>                                                        | <b>P-value</b>      |
| GO:0046873                                                                        | MF              | metal ion transmembrane transporter activity                       | $1 \times 10^{-14}$ |
| GO:0005216                                                                        | MF              | ion channel activity                                               | $3 \times 10^{-14}$ |
| GO:0022838                                                                        | MF              | substrate specific channel activity                                | $3 \times 10^{-14}$ |
| GO:0005261                                                                        | MF              | cation channel activity                                            | $4 \times 10^{-14}$ |
| GO:0022836                                                                        | MF              | gated channel activity                                             | $5 \times 10^{-14}$ |
| GO:0005262                                                                        | MF              | calcium channel activity                                           | $2 \times 10^{-12}$ |
| GO:0006816                                                                        | BP              | calcium ion transport                                              | $6 \times 10^{-11}$ |
| GO:0015674                                                                        | BP              | di-, tri-valent inorganic cation transport                         | $2 \times 10^{-10}$ |
| GO:0005245                                                                        | MF              | voltage-gated calcium channel activity                             | $7 \times 10^{-9}$  |
| GO:0022843                                                                        | MF              | voltage-gated cation channel activity                              | $2 \times 10^{-8}$  |
| GO:0034702                                                                        | CC              | ion channel complex                                                | $2 \times 10^{-8}$  |
| GO:0022832                                                                        | MF              | voltage-gated channel activity                                     | $1 \times 10^{-7}$  |
| GO:0005244                                                                        | MF              | voltage-gated ion channel activity                                 | $1 \times 10^{-7}$  |
| GO:0022834                                                                        | MF              | ligand-gated channel activity                                      | $1 \times 10^{-5}$  |
| GO:0015276                                                                        | MF              | ligand-gated ion channel activity                                  | $1 \times 10^{-5}$  |
| GO:0034703                                                                        | CC              | cation channel complex                                             | $3 \times 10^{-5}$  |
| GO:0005891                                                                        | CC              | voltage-gated calcium channel complex                              | $8 \times 10^{-5}$  |
| GO:0034704                                                                        | CC              | calcium channel complex                                            | 0.0001              |
| GO:0044456                                                                        | CC              | synapse part                                                       | 0.0003              |
| GO:0045211                                                                        | CC              | postsynaptic membrane                                              | 0.0005              |
| GO:0007187                                                                        | BP              | G-protein signaling, coupled to cyclic nucleotide second messenger | 0.0009              |
| GO:0019932                                                                        | BP              | second-messenger-mediated signaling                                | 0.0009              |
| GO:0019935                                                                        | BP              | cyclic-nucleotide-mediated signaling                               | 0.001               |
| GO:0042383                                                                        | CC              | sarcolemma                                                         | 0.001               |
| GO:0005230                                                                        | MF              | extracellular ligand-gated ion channel activity                    | 0.002               |

|                                                          |                 |                                                                  |                    |
|----------------------------------------------------------|-----------------|------------------------------------------------------------------|--------------------|
| GO:0045202                                               | CC              | synapse                                                          | 0.002              |
| GO:0007268                                               | BP              | synaptic transmission                                            | 0.002              |
| GO:0019226                                               | BP              | transmission of nerve impulse                                    | 0.003              |
| GO:0030315                                               | CC              | T-tubule                                                         | 0.004              |
| GO:0042165                                               | MF              | neurotransmitter binding                                         | 0.004              |
| GO:0006873                                               | BP              | cellular ion homeostasis                                         | 0.004              |
| GO:0055082                                               | BP              | cellular chemical homeostasis                                    | 0.004              |
| GO:0043176                                               | MF              | amine binding                                                    | 0.005              |
| GO:0007188                                               | BP              | G-protein signaling, coupled to cAMP nucleotide second messenger | 0.005              |
| GO:0045761                                               | BP              | regulation of adenylate cyclase activity                         | 0.006              |
| GO:0019933                                               | BP              | cAMP-mediated signaling                                          | 0.006              |
| GO:0031279                                               | BP              | regulation of cyclase activity                                   | 0.007              |
| GO:0051339                                               | BP              | regulation of lyase activity                                     | 0.007              |
| GO:0030817                                               | BP              | regulation of cAMP biosynthetic process                          | 0.007              |
| GO:0030814                                               | BP              | regulation of cAMP metabolic process                             | 0.007              |
| GO:0008066                                               | MF              | glutamate receptor activity                                      | 0.007              |
| GO:0030799                                               | BP              | regulation of cyclic nucleotide metabolic process                | 0.007              |
| GO:0030802                                               | BP              | regulation of cyclic nucleotide biosynthetic process             | 0.007              |
| GO:0030808                                               | BP              | regulation of nucleotide biosynthetic process                    | 0.007              |
| GO:0006140                                               | BP              | regulation of nucleotide metabolic process                       | 0.008              |
| GO:0016529                                               | CC              | sarcoplasmic reticulum                                           | 0.01               |
| GO:0016528                                               | CC              | sarcoplasm                                                       | 0.01               |
| GO:0007613                                               | BP              | memory                                                           | 0.02               |
| GO:0031674                                               | CC              | I band                                                           | 0.02               |
| GO:0006874                                               | BP              | cellular calcium ion homeostasis                                 | 0.03               |
| GO:0055074                                               | BP              | calcium ion homeostasis                                          | 0.03               |
| GO:0006875                                               | BP              | cellular metal ion homeostasis                                   | 0.03               |
| GO:0031280                                               | BP              | negative regulation of cyclase activity                          | 0.03               |
| GO:0007194                                               | BP              | negative regulation of adenylate cyclase activity                | 0.03               |
| GO:0051350                                               | BP              | negative regulation of lyase activity                            | 0.03               |
| GO:0055065                                               | BP              | metal ion homeostasis                                            | 0.03               |
| GO:0030005                                               | BP              | cellular di-, tri-valent inorganic cation homeostasis            | 0.04               |
| GO:0055066                                               | BP              | di-, tri-valent inorganic cation homeostasis                     | 0.04               |
| <b>Neuronal signaling / cytoskeleton (Fig. 1, green)</b> |                 |                                                                  |                    |
| <b>GO ID</b>                                             | <b>Ontology</b> | <b>Term</b>                                                      | <b>P-value</b>     |
| GO:0051015                                               | MF              | actin filament binding                                           | 6x10 <sup>-9</sup> |
| GO:0032989                                               | BP              | cellular component morphogenesis                                 | 3x10 <sup>-7</sup> |
| GO:0030036                                               | BP              | actin cytoskeleton organization                                  | 3x10 <sup>-7</sup> |
| GO:0015629                                               | CC              | actin cytoskeleton                                               | 4x10 <sup>-7</sup> |
| GO:0030029                                               | BP              | actin filament-based process                                     | 5x10 <sup>-7</sup> |
| GO:0005913                                               | CC              | cell-cell adherens junction                                      | 6x10 <sup>-7</sup> |
| GO:0031252                                               | CC              | cell leading edge                                                | 9x10 <sup>-7</sup> |
| GO:0003779                                               | MF              | actin binding                                                    | 2x10 <sup>-6</sup> |
| GO:0004713                                               | MF              | protein tyrosine kinase activity                                 | 3x10 <sup>-6</sup> |
| GO:0000902                                               | BP              | cell morphogenesis                                               | 3x10 <sup>-6</sup> |
| GO:0030030                                               | BP              | cell projection organization                                     | 4x10 <sup>-6</sup> |
| GO:0005911                                               | CC              | cell-cell junction                                               | 6x10 <sup>-6</sup> |
| GO:0031175                                               | BP              | neuron projection development                                    | 7x10 <sup>-6</sup> |
| GO:0005912                                               | CC              | adherens junction                                                | 1x10 <sup>-5</sup> |
| GO:0048666                                               | BP              | neuron development                                               | 1x10 <sup>-5</sup> |
| GO:0007167                                               | BP              | enzyme linked receptor protein signaling pathway                 | 1x10 <sup>-5</sup> |
| GO:0004714                                               | MF              | transmembrane receptor protein tyrosine kinase                   | 2x10 <sup>-5</sup> |

|            |    | activity                                                         |                    |
|------------|----|------------------------------------------------------------------|--------------------|
| GO:0070161 | CC | anchoring junction                                               | 2x10 <sup>-5</sup> |
| GO:0001725 | CC | stress fiber                                                     | 7x10 <sup>-5</sup> |
| GO:0032432 | CC | actin filament bundle                                            | 9x10 <sup>-5</sup> |
| GO:0042641 | CC | actomyosin                                                       | 0.0001             |
| GO:0007507 | BP | heart development                                                | 0.0001             |
| GO:0007169 | BP | transmembrane receptor protein tyrosine kinase signaling pathway | 0.0001             |
| GO:0005916 | CC | fascia adherens                                                  | 0.0002             |
| GO:0030027 | CC | lamellipodium                                                    | 0.0002             |
| GO:0000904 | BP | cell morphogenesis involved in differentiation                   | 0.0003             |
| GO:0022604 | BP | regulation of cell morphogenesis                                 | 0.0003             |
| GO:0014704 | CC | intercalated disc                                                | 0.0005             |
| GO:0005938 | CC | cell cortex                                                      | 0.0006             |
| GO:0048812 | BP | neuron projection morphogenesis                                  | 0.0007             |
| GO:0030425 | CC | dendrite                                                         | 0.0009             |
| GO:0005516 | MF | calmodulin binding                                               | 0.001              |
| GO:0045296 | MF | cadherin binding                                                 | 0.001              |
| GO:0044449 | CC | contractile fiber part                                           | 0.001              |
| GO:0043005 | CC | neuron projection                                                | 0.001              |
| GO:0043531 | MF | ADP binding                                                      | 0.001              |
| GO:0043292 | CC | contractile fiber                                                | 0.002              |
| GO:0048858 | BP | cell projection morphogenesis                                    | 0.002              |
| GO:0032990 | BP | cell part morphogenesis                                          | 0.002              |
| GO:0007409 | BP | axonogenesis                                                     | 0.003              |
| GO:0016477 | BP | cell migration                                                   | 0.003              |
| GO:0008285 | BP | negative regulation of cell proliferation                        | 0.004              |
| GO:0048667 | BP | cell morphogenesis involved in neuron differentiation            | 0.004              |
| GO:0007243 | BP | protein kinase cascade                                           | 0.004              |
| GO:0050839 | MF | cell adhesion molecule binding                                   | 0.005              |
| GO:0008013 | MF | beta-catenin binding                                             | 0.005              |
| GO:0048870 | BP | cell motility                                                    | 0.006              |
| GO:0051674 | BP | localization of cell                                             | 0.006              |
| GO:0030898 | MF | actin-dependent ATPase activity                                  | 0.007              |
| GO:0007265 | BP | Ras protein signal transduction                                  | 0.007              |
| GO:0030017 | CC | sarcomere                                                        | 0.007              |
| GO:0043010 | BP | camera-type eye development                                      | 0.007              |
| GO:0001568 | BP | blood vessel development                                         | 0.008              |
| GO:0007611 | BP | learning or memory                                               | 0.008              |
| GO:0030018 | CC | Z disc                                                           | 0.008              |
| GO:0001944 | BP | vasculature development                                          | 0.009              |
| GO:0017048 | MF | Rho GTPase binding                                               | 0.009              |
| GO:0051271 | BP | negative regulation of cell motion                               | 0.009              |
| GO:0019903 | MF | protein phosphatase binding                                      | 0.009              |
| GO:0044433 | CC | cytoplasmic vesicle part                                         | 0.01               |
| GO:0030016 | CC | myofibril                                                        | 0.01               |
| GO:0042692 | BP | muscle cell differentiation                                      | 0.01               |
| GO:0030426 | CC | growth cone                                                      | 0.01               |
| GO:0016328 | CC | lateral plasma membrane                                          | 0.01               |
| GO:0030427 | CC | site of polarized growth                                         | 0.01               |
| GO:0031674 | CC | I band                                                           | 0.01               |
| GO:0040012 | BP | regulation of locomotion                                         | 0.01               |
| GO:0051270 | BP | regulation of cell motion                                        | 0.01               |

|                                                        |                 |                                                                      |                     |
|--------------------------------------------------------|-----------------|----------------------------------------------------------------------|---------------------|
| GO:0019902                                             | MF              | phosphatase binding                                                  | 0.01                |
| GO:0016337                                             | BP              | cell-cell adhesion                                                   | 0.01                |
| GO:0009798                                             | BP              | axis specification                                                   | 0.01                |
| GO:0001654                                             | BP              | eye development                                                      | 0.01                |
| GO:0010035                                             | BP              | response to inorganic substance                                      | 0.02                |
| GO:0010769                                             | BP              | regulation of cell morphogenesis involved in differentiation         | 0.02                |
| GO:0016459                                             | CC              | myosin complex                                                       | 0.02                |
| GO:0001726                                             | CC              | ruffle                                                               | 0.02                |
| GO:0005083                                             | MF              | small GTPase regulator activity                                      | 0.02                |
| GO:0031594                                             | CC              | neuromuscular junction                                               | 0.02                |
| GO:0007423                                             | BP              | sensory organ development                                            | 0.02                |
| GO:0000146                                             | MF              | microfilament motor activity                                         | 0.03                |
| GO:0030424                                             | CC              | axon                                                                 | 0.03                |
| GO:0048593                                             | BP              | camera-type eye morphogenesis                                        | 0.03                |
| GO:0043025                                             | CC              | cell soma                                                            | 0.03                |
| GO:0030334                                             | BP              | regulation of cell migration                                         | 0.04                |
| GO:0019992                                             | MF              | diacylglycerol binding                                               | 0.04                |
| GO:0030111                                             | BP              | regulation of Wnt receptor signaling pathway                         | 0.04                |
| GO:0018108                                             | BP              | peptidyl-tyrosine phosphorylation                                    | 0.04                |
| GO:0045859                                             | BP              | regulation of protein kinase activity                                | 0.04                |
| GO:0018212                                             | BP              | peptidyl-tyrosine modification                                       | 0.04                |
| GO:0007163                                             | BP              | establishment or maintenance of cell polarity                        | 0.04                |
| GO:0003774                                             | MF              | motor activity                                                       | 0.04                |
| GO:0043549                                             | BP              | regulation of kinase activity                                        | 0.04                |
| GO:0048729                                             | BP              | tissue morphogenesis                                                 | 0.04                |
| GO:0019904                                             | MF              | protein domain specific binding                                      | 0.05                |
| GO:0030705                                             | BP              | cytoskeleton-dependent intracellular transport                       | 0.05                |
| <b>Chromatin modification/regulation (Fig. 1, red)</b> |                 |                                                                      |                     |
| <b>GO ID</b>                                           | <b>Ontology</b> | <b>Term</b>                                                          | <b>P-value</b>      |
| GO:0016568                                             | BP              | chromatin modification                                               | 3x10 <sup>-13</sup> |
| GO:0006325                                             | BP              | chromatin organization                                               | 1x10 <sup>-12</sup> |
| GO:0004386                                             | MF              | helicase activity                                                    | 4x10 <sup>-10</sup> |
| GO:0016887                                             | MF              | ATPase activity                                                      | 2x10 <sup>-5</sup>  |
| GO:0016569                                             | BP              | covalent chromatin modification                                      | 4x10 <sup>-5</sup>  |
| GO:0016585                                             | CC              | chromatin remodeling complex                                         | 7x10 <sup>-5</sup>  |
| GO:0042623                                             | MF              | ATPase activity, coupled                                             | 0.0002              |
| GO:0003712                                             | MF              | transcription cofactor activity                                      | 0.0003              |
| GO:0016570                                             | BP              | histone modification                                                 | 0.0003              |
| GO:0000123                                             | CC              | histone acetyltransferase complex                                    | 0.0003              |
| GO:0008026                                             | MF              | ATP-dependent helicase activity                                      | 0.0004              |
| GO:0070035                                             | MF              | purine NTP-dependent helicase activity                               | 0.0004              |
| GO:0016573                                             | BP              | histone acetylation                                                  | 0.001               |
| GO:0006473                                             | BP              | protein amino acid acetylation                                       | 0.001               |
| GO:0000122                                             | BP              | negative regulation of transcription from RNA polymerase II promoter | 0.001               |
| GO:0016564                                             | MF              | transcription repressor activity                                     | 0.002               |
| GO:0043543                                             | BP              | protein amino acid acylation                                         | 0.002               |
| GO:0003678                                             | MF              | DNA helicase activity                                                | 0.003               |
| GO:0042393                                             | MF              | histone binding                                                      | 0.004               |
| GO:0000118                                             | CC              | histone deacetylase complex                                          | 0.004               |
| GO:0017053                                             | CC              | transcriptional repressor complex                                    | 0.004               |
| GO:0000398                                             | BP              | nuclear mRNA splicing, via spliceosome                               | 0.004               |

|            |    |                                                                                      |       |
|------------|----|--------------------------------------------------------------------------------------|-------|
| GO:0000377 | BP | RNA splicing, via transesterification reactions with bulged adenosine as nucleophile | 0.004 |
| GO:0000375 | BP | RNA splicing, via transesterification reactions                                      | 0.004 |
| GO:0045892 | BP | negative regulation of transcription, DNA-dependent                                  | 0.005 |
| GO:0051253 | BP | negative regulation of RNA metabolic process                                         | 0.005 |
| GO:0016071 | BP | mRNA metabolic process                                                               | 0.006 |
| GO:0010553 | BP | negative regulation of specific transcription from RNA polymerase II promoter        | 0.007 |
| GO:0008380 | BP | RNA splicing                                                                         | 0.008 |
| GO:0006281 | BP | DNA repair                                                                           | 0.008 |
| GO:0008094 | MF | DNA-dependent ATPase activity                                                        | 0.008 |
| GO:0035267 | CC | NuA4 histone acetyltransferase complex                                               | 0.01  |
| GO:0003743 | MF | translation initiation factor activity                                               | 0.01  |
| GO:0043189 | CC | H4/H2A histone acetyltransferase complex                                             | 0.01  |
| GO:0032582 | BP | negative regulation of gene-specific transcription                                   | 0.01  |
| GO:0043968 | BP | histone H2A acetylation                                                              | 0.01  |
| GO:0003714 | MF | transcription corepressor activity                                                   | 0.01  |
| GO:0006397 | BP | mRNA processing                                                                      | 0.01  |
| GO:0003682 | MF | chromatin binding                                                                    | 0.01  |
| GO:0006974 | BP | response to DNA damage stimulus                                                      | 0.03  |
| GO:0043967 | BP | histone H4 acetylation                                                               | 0.03  |
| GO:0070647 | BP | protein modification by small protein conjugation or removal                         | 0.03  |
| GO:0040029 | BP | regulation of gene expression, epigenetic                                            | 0.03  |
| GO:0008135 | MF | translation factor activity, nucleic acid binding                                    | 0.03  |
| GO:0005876 | CC | spindle microtubule                                                                  | 0.04  |
| GO:0000785 | CC | chromatin                                                                            | 0.04  |
| GO:0035064 | MF | methylated histone residue binding                                                   | 0.04  |

**Table S3.** Gene Ontology (GO) terms enriched in functional clusters of the implicated network (Fig. 1), as identified by DAVID (david.abcc.ncifcrf.gov). P-values shown in the table were corrected for multiple hypotheses testing using the Benjamini procedure available in DAVID. The ontology column indicates GO domain: BP for biological process, MF for molecular function, and CC for cellular component. Non-specific terms, i.e. terms associated with more than 400 human genes, are not shown.

| <b>Table S4. Gene Ontology (GO) terms using brain-expressed background genes</b> |                 |                                 |                    |
|----------------------------------------------------------------------------------|-----------------|---------------------------------|--------------------|
| <b>GO ID</b>                                                                     | <b>Ontology</b> | <b>Term</b>                     | <b>P-value</b>     |
| GO:0045202                                                                       | CC              | Synapse                         | $6 \times 10^{-5}$ |
| GO:0051015                                                                       | MF              | actin filament binding          | $9 \times 10^{-5}$ |
| GO:0016887                                                                       | MF              | ATPase activity                 | 0.0005             |
| GO:0005938                                                                       | CC              | cell cortex                     | 0.0008             |
| GO:0005911                                                                       | CC              | cell-cell junction              | 0.0009             |
| GO:0005913                                                                       | CC              | cell-cell adherens junction     | 0.0009             |
| GO:0031252                                                                       | CC              | cell leading edge               | 0.001              |
| GO:0045211                                                                       | CC              | postsynaptic membrane           | 0.001              |
| GO:0007611                                                                       | BP              | learning or memory              | 0.002              |
| GO:0005262                                                                       | MF              | calcium channel activity        | 0.002              |
| GO:0044456                                                                       | CC              | synapse part                    | 0.004              |
| GO:0004386                                                                       | MF              | helicase activity               | 0.005              |
| GO:0030036                                                                       | BP              | actin cytoskeleton organization | 0.006              |
| GO:0030029                                                                       | BP              | actin filament-based process    | 0.006              |
| GO:0014069                                                                       | CC              | postsynaptic density            | 0.006              |

|            |    |                        |       |
|------------|----|------------------------|-------|
| GO:0016568 | BP | chromatin modification | 0.008 |
| GO:0030425 | CC | Dendrite               | 0.02  |
| GO:0015629 | CC | actin cytoskeleton     | 0.02  |
| GO:0043005 | CC | neuron projection      | 0.02  |

**Table S4.** Gene Ontology (GO) terms enriched in the implicated network (Fig. 1), as identified by DAVID using brain-expressed background genes. Background genes used are genes in the top half of all human genes in terms of their average brain expression levels based on the Human Brain Transcriptome database. Notably, the average expression level of human genes selected in this way is very similar to the average expression level of genes in the implicated network. P-values shown in the table were corrected for multiple hypotheses testing using the Benjamini procedure available in DAVID. Non-specific terms, i.e. terms associated with more than 400 human genes, are not shown.

| Table S5. Overlap between ASD gene sets and additional FMRP targets or PSD proteins |                 |                                   |         |                                  |                    |
|-------------------------------------------------------------------------------------|-----------------|-----------------------------------|---------|----------------------------------|--------------------|
| Gene set                                                                            | Number of genes | Ascano <i>et al.</i> FMRP targets |         | Bayes <i>et al.</i> PSD proteins |                    |
|                                                                                     |                 | Expected : observed               | P-value | Expected : observed              | P-value            |
| Network genes                                                                       | 159             | 17.5 : 32 (1 : 1.83)              | 0.0008  | 8.52 : 29 (1 : 3.4)              | 7x10 <sup>-9</sup> |
| Truncating SNV genes                                                                | 108             | 11.9 : 13 (1 : 1.09)              | 0.8     | 5.79 : 11 (1 : 1.9)              | 0.05               |
| Network non-truncating-SNV genes                                                    | 138             | 15.2 : 25 (1 : 1.65)              | 0.013   | 7.4 : 22 (1 : 2.97)              | 5x10 <sup>-6</sup> |
| Neuronal signaling/cytoskeleton cluster genes                                       | 69              | 7.59 : 13 (1 : 1.71)              | 0.05    | 3.7 : 15 (1 : 4.06)              | 3x10 <sup>-6</sup> |
| Chromatin modification/regulation cluster genes                                     | 50              | 5.5 : 12 (1 : 2.18)               | 0.01    | 2.68 : 2 (1 : 0.746)             | 1                  |
| Postsynaptic density cluster genes                                                  | 11              | 1.21 : 2 (1 : 1.65)               | 0.3     | 0.59 : 7 (1 : 11.9)              | 3x10 <sup>-7</sup> |
| Channel activity cluster genes                                                      | 21              | 2.31 : 1 (1 : 0.43)               | 0.7     | 1.13 : 3 (1 : 2.66)              | 0.1                |
| Non-network SNV genes                                                               | 449             | 49.4 : 45 (1 : 0.91)              | 0.5     | 24.1 : 14 (1 : 0.582)            | 0.04               |
| Sibling SNV genes                                                                   | 355             | 39.1 : 47 (1 : 1.20)              | 0.2     | 19 : 20 (1 : 1.05)               | 0.8                |

**Table S5.** The expected and observed number of FMRP targets<sup>30</sup> and PSD-localized proteins<sup>31</sup> among different sets of implicated genes. The expected numbers of FMRP targets or PSD proteins were obtained based on the proportion of rare synonymous variants observed in a recent large-scale survey of human genetic variation<sup>29</sup>. The significances of the overlaps were established using the two-tail binominal test.

| Table S6. Overlap between ASD gene sets and FMRP targets compared to matched null sets |                 |                             |          |
|----------------------------------------------------------------------------------------|-----------------|-----------------------------|----------|
| Gene set                                                                               | Number of genes | Expected : observed (Ratio) | P-value  |
| Network genes                                                                          | 159             | 29.6 : 48 (1 : 1.62)        | < 0.0001 |
| Truncating SNV network genes                                                           | 21              | 4.1 : 8 (1 : 1.94)          | 0.02     |
| Non-truncating SNV network genes                                                       | 138             | 25.4 : 40 (1 : 1.57)        | 0.0004   |
| Truncating SNV genes                                                                   | 108             | 14.9 : 25 (1 : 1.68)        | 0.0014   |
| Non-network SNV genes                                                                  | 449             | 44.6 : 40 (1 : 0.90)        | 0.8      |
| Sibling SNV genes                                                                      | 355             | 38.9 : 47 (1 : 1.21)        | 0.1      |

**Table S6.** The expected and observed number of FMRP targets proteins from Darnell *et al.* (2008). The expected numbers of FMRP targets were obtained by comparing overlap with sets of random genes of similar protein length and network connectivity to the genes in various sets. The test P-values reflect the probability of observing a matched gene set with the FMRP overlap greater or equal overlap to the one observed in real data.

| Table S7. Probands versus siblings expression biases across brain regions |               |                 |
|---------------------------------------------------------------------------|---------------|-----------------|
| Brain region                                                              | Network genes | Truncating SNVs |
| Amygdala                                                                  | 0.98          | 0.63            |
| Cerebellum                                                                | 0.96          | 0.59            |

|                  |      |      |
|------------------|------|------|
| Frontal          | 1.00 | 0.67 |
| Hippocampus      | 0.98 | 0.68 |
| Occipital        | 1.01 | 0.67 |
| Parietal         | 1.01 | 0.66 |
| Striatum/ganglia | 1.00 | 0.64 |
| Temporal         | 1.01 | 0.66 |
| Thalamus         | 0.90 | 0.57 |

**Table S7.** Probands versus siblings expression biases for network genes and for truncating SNV genes across different brain regions. Human expression data used to calculate the biases were obtained from the HBT database. To quantify the expression bias for each brain region, we calculated the difference between the average  $\log_2$  expression of implicated genes and the average  $\log_2$  expression of genes harboring SNVs in unaffected siblings. For all comparisons in the table, the Wilcoxon rank-sum one-tail test P-values after the Bonferroni correction were lower than  $1 \times 10^{-20}$ .

| Table S8. Probands versus siblings expression biases across CNS cell types            |               |              |                           |               |                              |                            |
|---------------------------------------------------------------------------------------|---------------|--------------|---------------------------|---------------|------------------------------|----------------------------|
| Primary cell type                                                                     | Network genes |              | Recurrent truncating SNVs |               | Corrected Stouffer's P-value | Corrected Fisher's P-value |
|                                                                                       | Bias          | P-value      | Bias                      | P-value       |                              |                            |
| Astroglia (includes Bergman Glia)                                                     | 0.01          | 0.3          | -0.08                     | 0.4           | 1                            | 1                          |
| Astroglia (reactive and non-reactive, JD130 line)                                     | 0.02          | 0.2          | 0.68                      | 0.2           | 1                            | 1                          |
| Astroglia (reactive and non-reactive, JD133 line)                                     | -0.01         | 0.2          | 0.76                      | 0.15          | 1                            | 1                          |
| Bergman Glia                                                                          | 0.14          | 0.2          | 0.53                      | 0.3           | 1                            | 1                          |
| Cholinergic Neurons (corpus striatum)                                                 | -0.01         | 0.3          | 0.91                      | 0.05          | 1                            | 1                          |
| Cholinergic Projection Neurons (basal forebrain)                                      | 0.01          | 0.3          | 1.07                      | <b>0.05</b>   | 1                            | 1                          |
| Drd1 Positive Medium Spiny Neurons (striatum)                                         | 0.40          | <b>0.007</b> | 2.09                      | <b>0.0005</b> | <b>0.0006</b>                | <b>0.001</b>               |
| Drd2 Positive Medium Spiny Neurons (striatum)                                         | 0.42          | <b>0.01</b>  | 1.30                      | <b>0.03</b>   | <b>0.04</b>                  | 0.07                       |
| Granule Cell Layer Interneurons (Inner Golgi Cells)                                   | -0.14         | 0.2          | 0.39                      | 0.2           | 1                            | 1                          |
| Granule Cells, Deep Cerebellar Nuclei                                                 | 0.40          | <b>0.007</b> | 1.24                      | <b>0.04</b>   | <b>0.03</b>                  | 0.06                       |
| Interneurons (cortex)                                                                 | 0.30          | 0.04         | 2.12                      | <b>0.001</b>  | <b>0.008</b>                 | <b>0.012</b>               |
| Layer 5a Corticostriatal Pyramidal Neurons                                            | 0.45          | <b>0.02</b>  | 2.31                      | <b>0.0015</b> | <b>0.005</b>                 | <b>0.008</b>               |
| Layer 5b Corticospinal, Corticopontine Pyramidal Neurons, and Small Pyramidal Neurons | 0.35          | 0.04         | 2.14                      | <b>0.002</b>  | <b>0.014</b>                 | <b>0.02</b>                |
| Layer 6 Corticothalamic Pyramidal Neurons                                             | 0.36          | 0.03         | 2.41                      | <b>0.0006</b> | <b>0.004</b>                 | <b>0.005</b>               |
| Mature Oligodendrocytes (cerebellum)                                                  | 0.13          | 0.2          | 0.87                      | 0.1           | 1                            | 1                          |
| Mature Oligodendrocytes (cortex)                                                      | 0.04          | 0.3          | 1.44                      | <b>0.02</b>   | 0.8                          | 0.9                        |
| Mature Oligodendrocytes and Progenitors (cerebellum)                                  | 0.02          | 0.3          | 0.33                      | 0.4           | 1                            | 1                          |
| Mature Oligodendrocytes and Progenitors (cortex)                                      | 0.005         | 0.4          | 1.09                      | 0.07          | 1                            | 1                          |
| Mixed Neurons (cortex)                                                                | 0.37          | <b>0.01</b>  | 2.35                      | <b>0.0004</b> | <b>0.0008</b>                | <b>0.0014</b>              |
| Motor Neurons, Cholinergic Interneurons                                               | -0.20         | 0.7          | 0.17                      | 0.4           | 1                            | 1                          |
| Motor Neurons, Midbrain Cholinergic Neurons                                           | -0.16         | 0.5          | 0.23                      | 0.4           | 1                            | 1                          |
| Neurons (cortex)                                                                      | 0.12          | 0.05         | 1.43                      | <b>0.007</b>  | <b>0.04</b>                  | 0.08                       |
| Purkinje Cells                                                                        | 0.03          | 0.04         | 0.38                      | 0.16          | 0.6                          | 0.9                        |
| Stellate and Basket Cells                                                             | 0.15          | 0.14         | 0.36                      | 0.5           | 1                            | 1                          |
| Unipolar Brush Cells (mGluR1 subtype)                                                 | 0.19          | 0.16         | 1.62                      | <b>0.02</b>   | 0.4                          | 0.5                        |

**Table S8.** Probands versus siblings cell expression biases across 25 cell types of the central nervous system for implicated network genes and for genes with recurrent truncating *de novo* SNVs. The biases were calculated using *Mus. musculus* expression data obtained from the study by Doyle *et al.*<sup>17</sup> To quantify the expression bias for each cell type, we calculate the difference between the average  $\log_2$  expression of mouse orthologs of human implicated genes and the average  $\log_2$  expression of ortholog genes harboring SNVs in unaffected siblings. The significances of the cell type expression biases were calculated using a one-tail Wilcoxon rank-sum test and corrected for multiple hypothesis testing using the Benjamini-Hochberg procedure with FDR = 10%; the significant tests are shown in bold. To combine P-values from the two independent approaches — one based on network genes and the other

based on genes affected by recurrent truncating mutations — we used Fisher’s and Stouffer’s meta-analysis methods. The combined P-values, shown in the last two columns, were corrected for multiple-hypothesis testing using the Bonferroni method; significant tests are shown in bold.

| <b>Table S9. Effect size significance of brain expression bias</b> |                |             |                    |                  |
|--------------------------------------------------------------------|----------------|-------------|--------------------|------------------|
| <b>Prenatal versus postnatal bias</b>                              |                |             |                    |                  |
| <b>Gene set</b>                                                    | <b>P-value</b> | <b>Bias</b> | <b>Null bias</b>   |                  |
|                                                                    |                |             | <b>Mean</b>        | <b>Std. dev.</b> |
| Network genes                                                      | < 0.0001       | 0.16        | -0.004             | 0.028            |
| Truncating SNV genes                                               | < 0.0001       | 0.18        | -0.004             | 0.041            |
| <b>Embryonic bias</b>                                              |                |             |                    |                  |
| Network truncating SNV genes                                       | < 0.0001       | 0.59        | -0.02              | 0.11             |
| Network CNV genes                                                  | < 0.0001       | 0.87        | -0.02              | 0.10             |
| Non-network SNV genes                                              | 0.3            | 0.001       | 0.001              | 0.030            |
| Sibling SNV genes                                                  | 0.2            | 0.02        | -0.01              | 0.033            |
| <b>Female versus male bias</b>                                     |                |             |                    |                  |
| Truncating SNV genes                                               | 0.002          | 0.58        | -0.008             | 0.19             |
| Non-network SNV genes                                              | 0.7            | -0.05       | 0.0006             | 0.088            |
| <b>Phenotype bias</b>                                              |                |             |                    |                  |
| Truncating SNVs, low vs. high IQ                                   | < 0.0001       | 0.95        | 0.007              | 0.18             |
| Truncating SNVs, high vs. low ADIR-S                               | 0.002          | 0.53        | -0.002             | 0.17             |
| Truncating SNVs, high vs. low ADIR-R                               | 0.08           | 0.24        | 4x10 <sup>-5</sup> | 0.17             |
| Network genes, low vs. high IQ                                     | 0.01           | 0.28        | 0.002              | 0.12             |
| Network genes, high vs. low ADIR-S                                 | 0.3            | 0.072       | -0.004             | 0.12             |
| Network genes, high vs. low ADIR-R                                 | 0.02           | 0.25        | 0.004              | 0.12             |

**Table S9.** The significance of the temporal, gender, and phenotype biases using randomly generated expression probe sets. The biases were calculated using human expression data obtained from the HBT database. To quantify the temporal brain expression biases, we calculated the difference between the average log<sub>2</sub> expression during early developmental periods (prenatal or embryonic) and the average log<sub>2</sub> expression during the later periods. To quantify the gender brain expression bias, we calculated the difference between the average log<sub>2</sub> expression of genes with mutations in female probands and male probands. To quantify the phenotype expression bias, we calculated the difference between the average log<sub>2</sub> expression of genes with mutations in probands of greater phenotypic severity and of less severity. The significances of various biases were computed using randomly generated probe sets. The numbers of probe sets sampled in random trials were equal to the numbers of probes sets in corresponding original datasets. Analogous to the procedure used to process the original HBT data, we computed the median probe set expression values in each of 10000 randomly generated probe sets; expression biases were calculated by taking the difference between the corresponding expression averages. The final P-values obtained using the random trials reflect the probability to obtain a bias greater or equal to the one observed in the original data.
